# Supplementary material for: Carbo[5]helicene versus planar phenanthrene as a scaffold for organic materials in OLEDs: the electroluminescence of anthracene-functionalized emissive materials
Source: Royal Society of Chemistry journal article supplement (doi:10.1039/c7nj02233f), 2017-01-01
Supplement: c7nj02233f1.pdf [file c7nj02233f1.pdf]

# New Journal of Chemistry

## ELECTRONIC SUPPLEMENTARY INFORMATION

### **Carbo[5]helicene versus Planar Phenanthrene as a Scaffold for Organic Materials in OLEDs: Electroluminescence of Anthracene-Functionalized Emissive Materials**

Samik Jhulki,<sup>a</sup> Abhaya Kumar Mishra,<sup>a</sup> Tahsin J. Chow,<sup>b,\*</sup> and  
Jarugu Narasimha Moorthy<sup>a,\*</sup>

<sup>a</sup>Department of Chemistry, Indian Institute of Technology, Kanpur 208016, INDIA

<sup>b</sup>Institute of Chemistry, Academia Sinica, Taipei, Taiwan 115, Republic of China

Email: [chowtj@gate.sinica.edu.tw](mailto:chowtj@gate.sinica.edu.tw); [moorthy@iitk.ac.in](mailto:moorthy@iitk.ac.in)

---

#### Table of Contents

---

|    |                                                                                                                                                                                                                                                                                                |         |
|----|------------------------------------------------------------------------------------------------------------------------------------------------------------------------------------------------------------------------------------------------------------------------------------------------|---------|
| 1  | General aspects and materials                                                                                                                                                                                                                                                                  | S2      |
| 2  | Details of single crystal X-ray structure determination, Table of crystal data, Ortep plot and crystal packing diagram of <b>PDANT</b>                                                                                                                                                         | S3-S5   |
| 3  | UV-vis profiles of 2,13-dibromocarbohelicene, phenanthrene and 9,10-diphenylanthracene                                                                                                                                                                                                         | S6      |
| 4  | CV profiles of <b>CHMANT</b> , <b>CHDANT</b> , <b>PMANT</b> and <b>PDANT</b>                                                                                                                                                                                                                   | S7      |
| 5  | TGA profiles of <b>CHMANT</b> , <b>CHDANT</b> , <b>PMANT</b> and <b>PDANT</b>                                                                                                                                                                                                                  | S7      |
| 6  | DSC profiles of <b>CHMANT</b> , <b>CHDANT</b> , <b>PMANT</b> and <b>PDANT</b>                                                                                                                                                                                                                  | S8      |
| 7  | Plots of external quantum efficiency vs current density, external quantum efficiency vs luminance, luminous efficiency vs current density, luminous efficiency vs luminance, power efficiency vs current density and power efficiency vs luminance for the nondoped devices of configuration A | S9      |
| 8  | Plots of external quantum efficiency, luminous efficiency and power efficiency vs current density and luminance for the doped devices in which <b>CHMANT</b> serves as a host                                                                                                                  | S10     |
| 9  | <sup>1</sup> H and <sup>13</sup> C NMR and mass spectra of <b>CHMANT</b>                                                                                                                                                                                                                       | S11-S13 |
| 10 | <sup>1</sup> H and <sup>13</sup> C NMR and mass spectra of <b>CHDANT</b>                                                                                                                                                                                                                       | S14-S16 |
| 11 | <sup>1</sup> H and <sup>13</sup> C NMR and mass spectra of <b>PMANT</b>                                                                                                                                                                                                                        | S17-S19 |
| 12 | <sup>1</sup> H and <sup>13</sup> C NMR and mass spectra of <b>PDANT</b>                                                                                                                                                                                                                        | S20-S22 |
| 13 | References                                                                                                                                                                                                                                                                                     | S22     |

---

**General aspects.**  $^1\text{H}$  NMR spectra were recorded on JEOL (400/500 MHz) spectrometers in  $\text{CDCl}_3$  as a solvent.  $^{13}\text{C}$  NMR spectra were recorded on JEOL-Lambda (100/125 MHz) spectrometers with complete proton decoupling. ESI and EI mass spectra analyses were carried out on Waters  $^{\text{Q}}$ TOF and GCT premier mass spectrometers, respectively. Melting points were determined with a JSGW melting point apparatus. IR spectra were recorded on a Bruker Vector 22 FT-IR spectrophotometer. The TGA and DSC measurements were carried out using Mettler-Toledo and SDT Q600 instruments, respectively, at 10  $^{\circ}\text{C}/\text{min}$  under a nitrogen gas atmosphere. UV-vis absorption spectra were recorded on a Shimadzu UV-1800 spectrophotometer. PL measurements in solution and solid state were carried out using FluoroMax-4; FM4-3000 spectrofluorimeter, Horiba Scientific. Cyclic voltammetry measurements were performed using CHI610E electrochemical work-station (CH instruments, Texas, USA). All solvents were distilled prior to use, and HPLC grade solvents used for UV-vis and PL measurements were procured from Merck. Column chromatography was conducted with a silica gel of 100-200 $\mu$  mesh.

**Materials.** ITO-coated glass slides (thickness 0.7 mm; resistance 11  $\Omega$ ) and NPB, TPBI, BCP, TmPyPB, LiF and Al, and HPLC grade solvents employed for cleaning of the ITO-coated glasses, and carrying out other measurements such as Uv-vis, fluorescence, CV, etc. were procured from commercial sources. Device fabrications and photophysical, thermal, electrochemical and electroluminescence characterizations were carried out as described elsewhere.<sup>S1-S2</sup>

### Details of Single Crystal X-Ray Structure Determination

The X-ray diffraction intensity data collection for the single crystals of **PDANT** was carried out with APEX-II CCD detector system equipped with Mo-sealed Siemens ceramic diffraction tube ( $\lambda = 0.7107 \text{ \AA}$ ) and a highly oriented graphite monochromator operating at 50 kV and 30 mA. The data were collected in a hemisphere mode and processed with Bruker's SAINT program. The structures were solved by direct methods using SHELXL package and refined by full matrix least-squares method based on  $F^2$  using SHELXL-2014 program (Sheldrick, 2014). The hydrogens were fixed geometrically, treated as riding on their nonhydrogens, and refined isotropically, while all nonhydrogens were subjected to anisotropic refinement. CCDC-1574102 (**PDANT**) contains the supplementary X-ray crystallographic data for this paper. These data can be obtained free of charge from the Cambridge Crystallographic Data Centre via [www.ccdc.cam.ac.uk/data\\_request/cif](http://www.ccdc.cam.ac.uk/data_request/cif).

**Table S1.** Crystal data of **PDANT**.

| parameters                                   | PDANT                                                |
|----------------------------------------------|------------------------------------------------------|
| Empirical formula                            | C <sub>54</sub> H <sub>34</sub> • 3CHCl <sub>3</sub> |
| Formula weight                               | 1040.99                                              |
| Temperature (K)                              | 100(2)                                               |
| Wavelength (Å)                               | 0.71073                                              |
| Solvent of crystallization                   | CHCl <sub>3</sub> /hexane                            |
| Crystal habit                                | Block                                                |
| Crystal color                                | Colorless                                            |
| Crystal system                               | Monoclinic                                           |
| Space group                                  | P2 <sub>1</sub> /n                                   |
| a (Å)                                        | 9.325 (4)                                            |
| b (Å)                                        | 16.641 (3)                                           |
| c (Å)                                        | 31.414 (5)                                           |
| α (deg)                                      | 90.000                                               |
| β (deg)                                      | 93.589 (3)                                           |
| γ (deg)                                      | 90.000                                               |
| Volume (Å <sup>3</sup> )                     | 4865.7 (13)                                          |
| Z                                            | 4                                                    |
| Calculated density (mg/m <sup>3</sup> )      | 1.421                                                |
| Absorption coefficient (mm <sup>-1</sup> )   | 0.557                                                |
| F(000)                                       | 2128                                                 |
| θ range for data collection (°)              | 1.785 to 28.303                                      |
| Index ranges                                 | -12 ≤ h ≤ 12<br>-15 ≤ k ≤ 21<br>-40 ≤ l ≤ 41         |
| Refinement method                            | Full-matrix least-squares on <i>F</i> <sup>2</sup>   |
| Goodness-of-fit on <i>F</i> <sup>2</sup>     | 1.032                                                |
| Final R indices [ <i>I</i> > 2σ( <i>I</i> )] | R <sub>1</sub> = 0.0884,<br>wR <sub>2</sub> = 0.1860 |
| R indices (all data)                         | R <sub>1</sub> = 0.1961,<br>wR <sub>2</sub> = 0.2471 |
| CCDC deposition number                       | 1574102                                              |

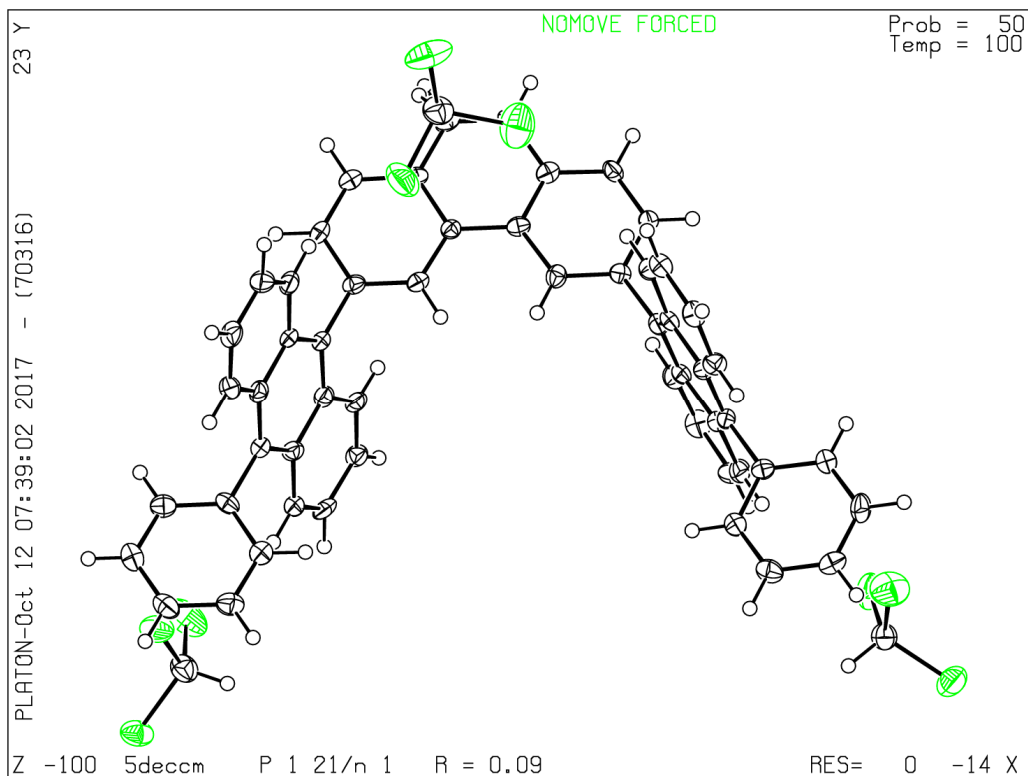

**Fig. S1** Ortep plot (drawn at 50% probability) of the structures of the **PDANT** along with three chloroform guest molecules (in green) found in the asymmetric unit.

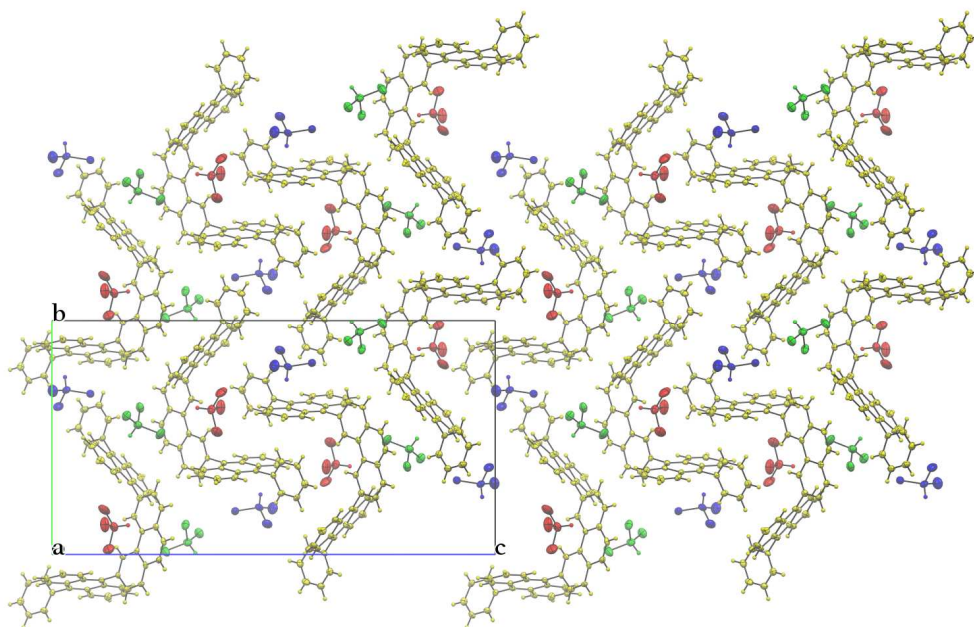

**Fig. S2** Crystal packing diagram of **PDANT** down a-axis. Notice that three guest chloroform molecules found for each **PDANT** are shown in different colors.

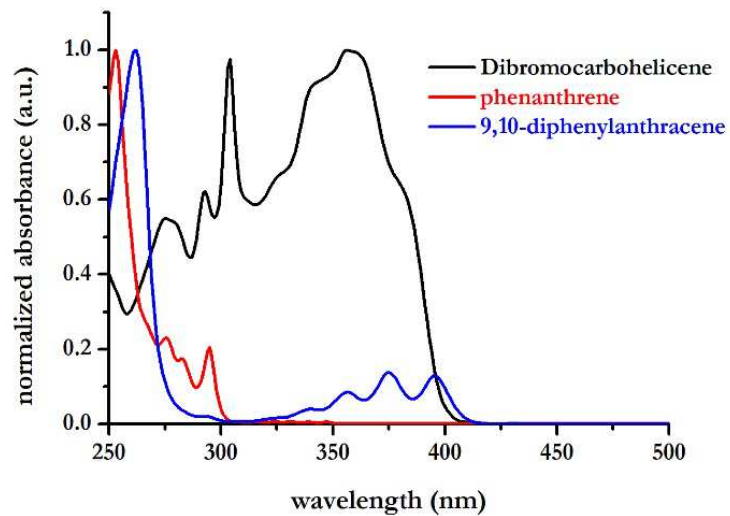

**Fig. S3** UV-vis profiles of 2,13-dibromocarbohelicene, phenanthrene and 9,10-diphenylanthracene.

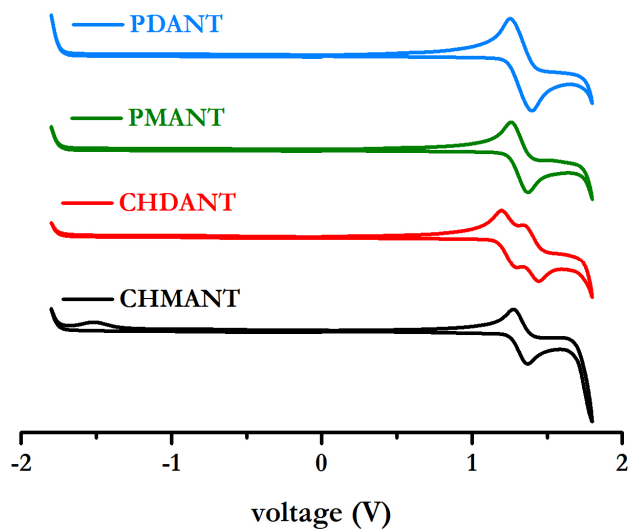

Fig. S4 CV profiles of CHMANT, CHDANT, PMANT and PDANT.

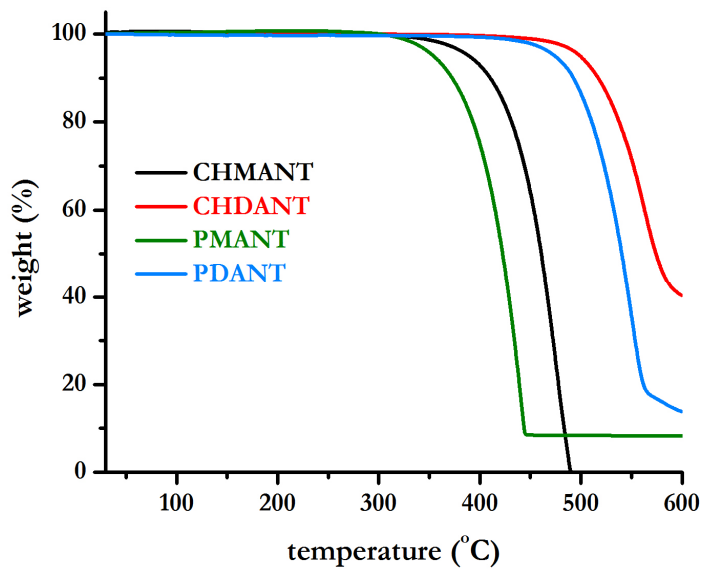

Fig. S5 TGA profiles of CHMANT, CHDANT, PMANT and PDANT.

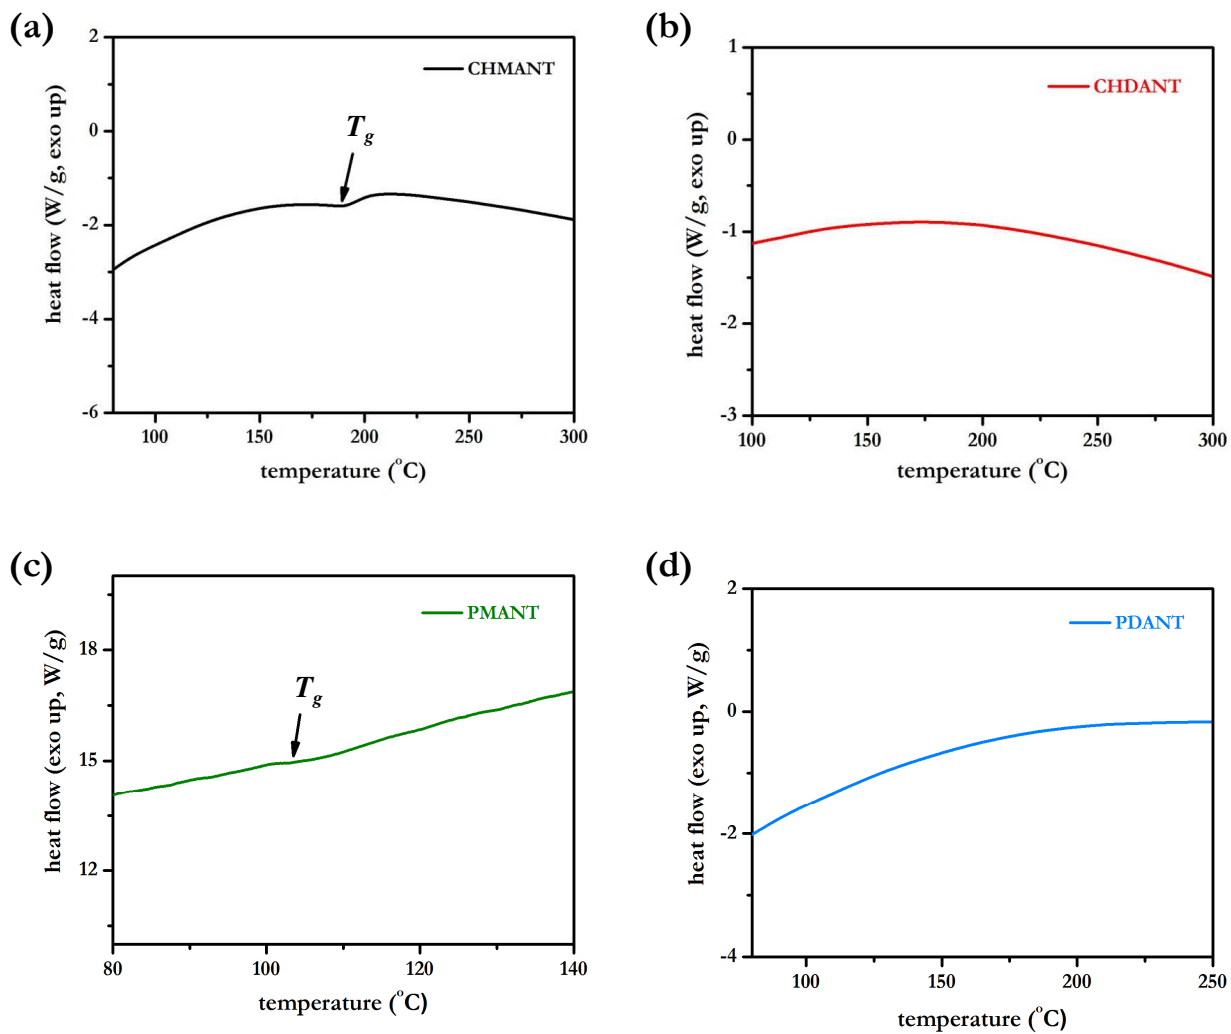

**Fig. S6** DSC profiles of **CHMANT**, **CHDANT**, **PMANT** and **PDANT**.



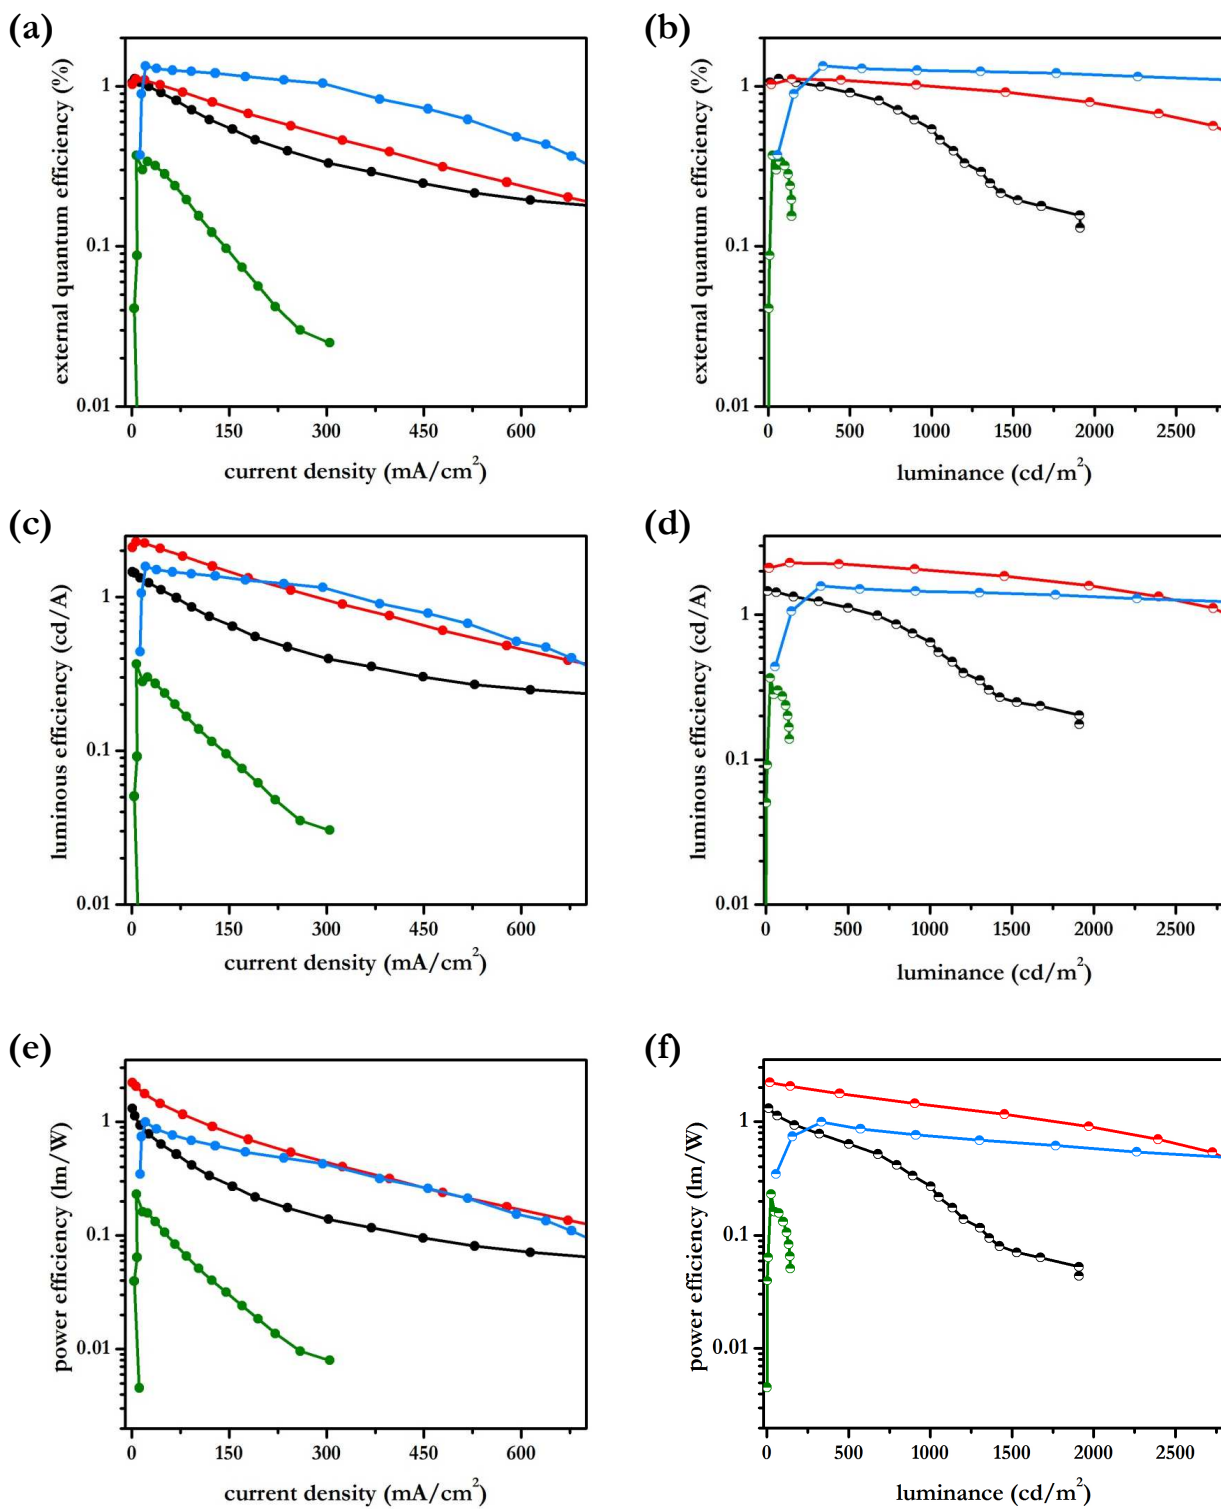

**Fig. S7** Plots of external quantum efficiency vs current density (a), external quantum efficiency vs luminance (b), luminous efficiency vs current density (c), luminous efficiency vs luminance (d), power efficiency vs current density (e) and power efficiency vs luminance (f) for the devices of configuration A fabricated with **CHMANT** (black), **CHDANT** (red), **PMANT** (olive) and **PDANT** (sky blue), refer to text.

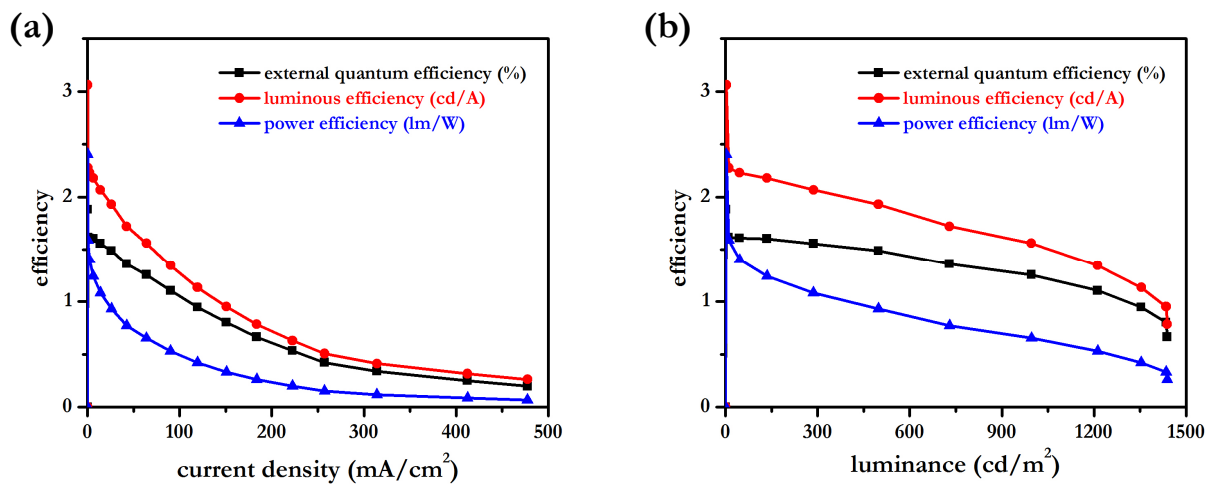

**Fig. S8** Plots of external quantum efficiency, luminous efficiency and power efficiency vs current density (a), and luminance (b) for the devices in which **CHTPA** doped in **CHMANT** serves as the emissive layer.

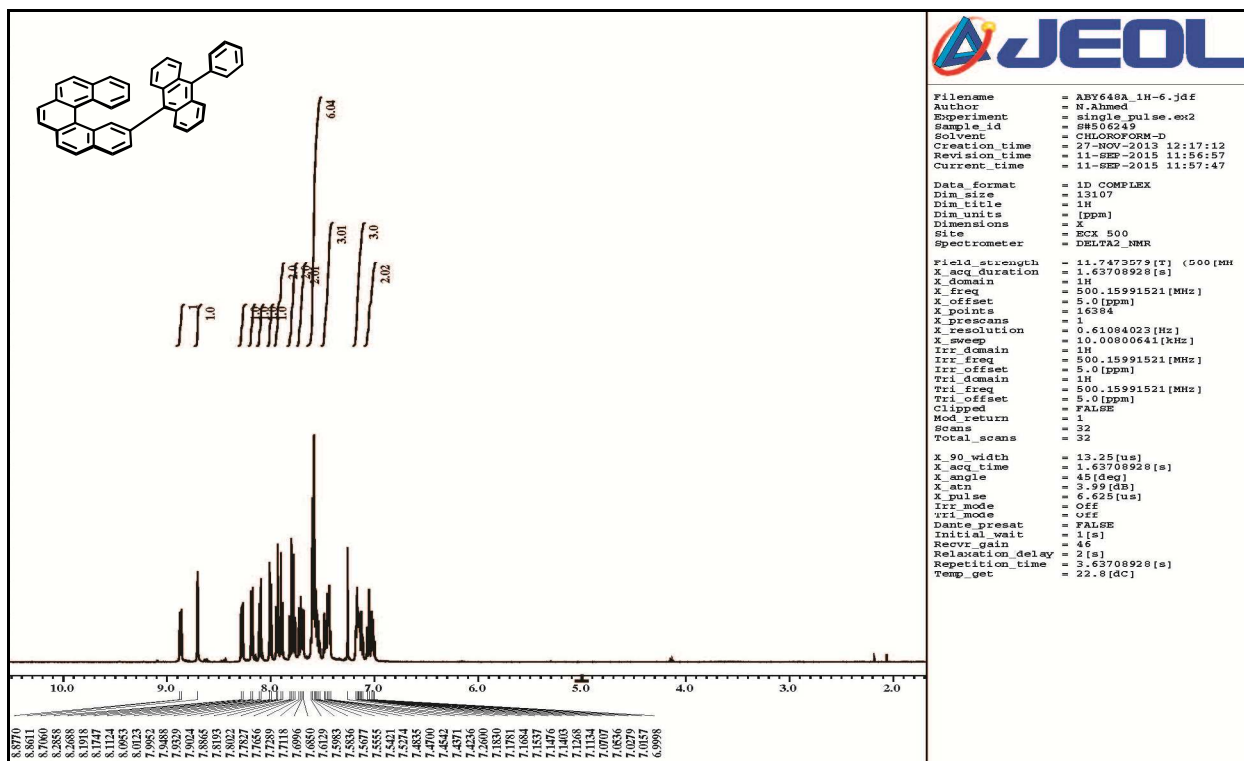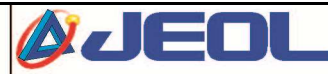

```

Filename      = ABY648A_1H-6.jdf
Author       = N.Ahmed
Experiment   = single_pulse.ex2
Sample_id    = S8506249
Solvent      = CHLOROFORM-D
Creation time = 27-NOV-2013 12:17:12
Revision time = 11-SEP-2015 11:56:57
Current time  = 11-SEP-2015 11:57:47

Data format   = 1D COMPLEX
Dim_size      = 13107
Dim_title     = 1H
Dim_units     = [ppm]
Dimensions    = X
Site          = CXZ 500
Spectrometer  = DELTA2_NMR

Field strength = 11.7472579 [T] (500 [MH]
X_acq_duration = 1.63708928 [s]
X_domain      = 1H
X_freq        = 500.15991521 [MHz]
X_offset      = 5.0 [ppm]
X_points      = 16384
X_prescans    = 1
X_resolution  = 0.61084023 [Hz]
X_sweep       = 10.00800641 [kHz]
Irr_domain    = 1H
Irr_freq      = 500.15991521 [MHz]
Irr_offset    = 5.0 [ppm]
Tri_domain    = 1H
Tri_freq      = 500.15991521 [MHz]
Tri_offset    = 5.0 [ppm]
Clipped       = FALSE
Mod_return    = 1
Scans         = 32
Total_scans   = 32

X_90_width    = 13.25 [us]
X_acq_time    = 1.63708928 [s]
X_angle       = 45 [deg]
X_sfn         = 3.99 [dB]
X_pulse       = 6.625 [us]
Irr_mode      = OFF
Tri_mode      = OFF
Dante_presat  = FALSE
Initial_wait  = 1 [s]
Recvr_gain    = 46
Relaxation_delay = 2 [s]
Repetition_time = 3.63708928 [s]
Temp_get      = 22.8 [dC]
  
```

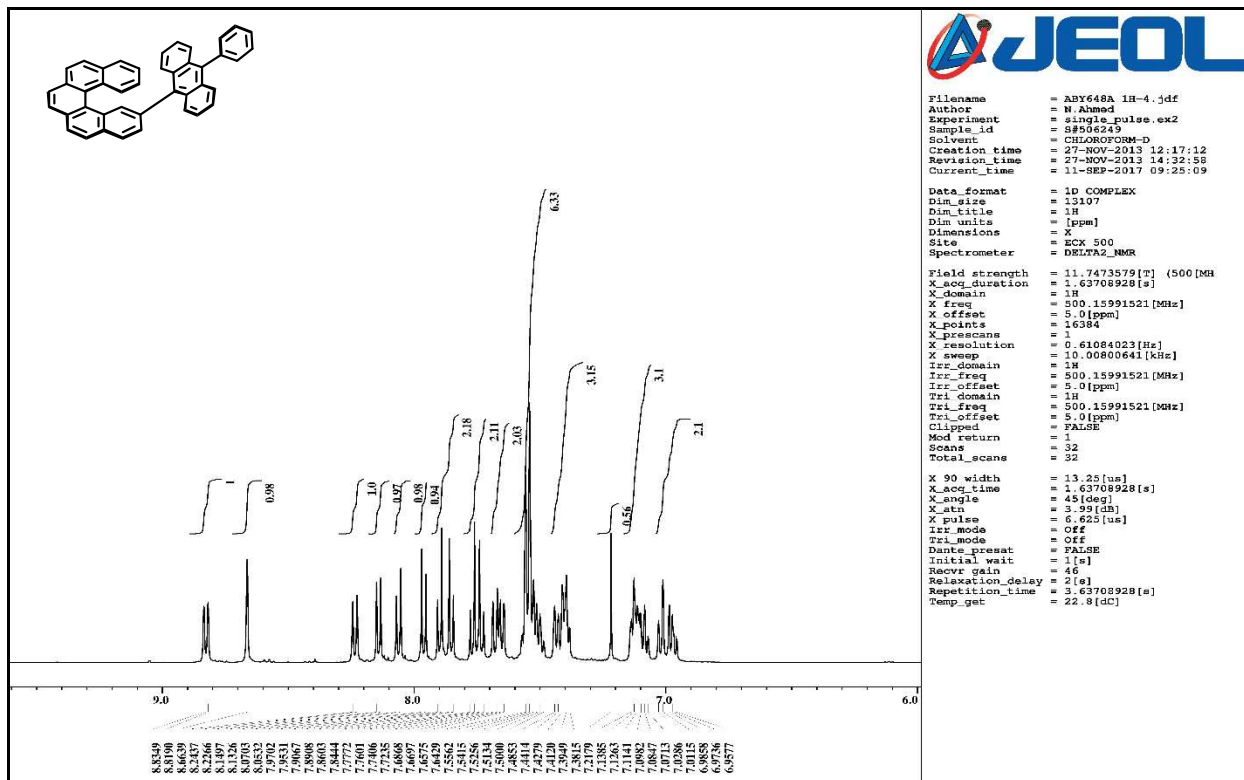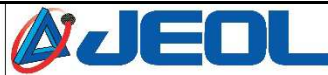

```

Filename      = ABY648A_1H-4.jdf
Author       = N.Ahmed
Experiment   = single_pulse.ex2
Sample_id    = S8506249
Solvent      = CHLOROFORM-D
Creation time = 27-NOV-2013 12:17:12
Revision time = 27-NOV-2013 14:32:58
Current time  = 11-SEP-2017 09:25:09

Data format   = 1D COMPLEX
Dim_size      = 13107
Dim_title     = 1H
Dim_units     = [ppm]
Dimensions    = X
Site          = CXZ 500
Spectrometer  = DELTA2_NMR

Field strength = 11.7473579 [T] (500 [MH]
X_acq_duration = 1.63708928 [s]
X_domain      = 1H
X_freq        = 500.15991521 [MHz]
X_offset      = 5.0 [ppm]
X_points      = 16384
X_prescans    = 1
X_resolution  = 0.61084023 [Hz]
X_sweep       = 10.00800641 [kHz]
Irr_domain    = 1H
Irr_freq      = 500.15991521 [MHz]
Irr_offset    = 5.0 [ppm]
Tri_domain    = 1H
Tri_freq      = 500.15991521 [MHz]
Tri_offset    = 5.0 [ppm]
Clipped       = FALSE
Mod_return    = 1
Scans         = 32
Total_scans   = 32

X_90_width    = 13.25 [us]
X_acq_time    = 1.63708928 [s]
X_angle       = 45 [deg]
X_sfn         = 3.99 [dB]
X_pulse       = 6.625 [us]
Irr_mode      = OFF
Tri_mode      = OFF
Dante_presat  = FALSE
Initial_wait  = 1 [s]
Recvr_gain    = 46
Relaxation_delay = 2 [s]
Repetition_time = 3.63708928 [s]
Temp_get      = 22.8 [dC]
  
```

Fig. S9 <sup>1</sup>H (500 MHz) NMR spectra (full scale: top, expanded: below) of CHMANT in CDCl<sub>3</sub>.

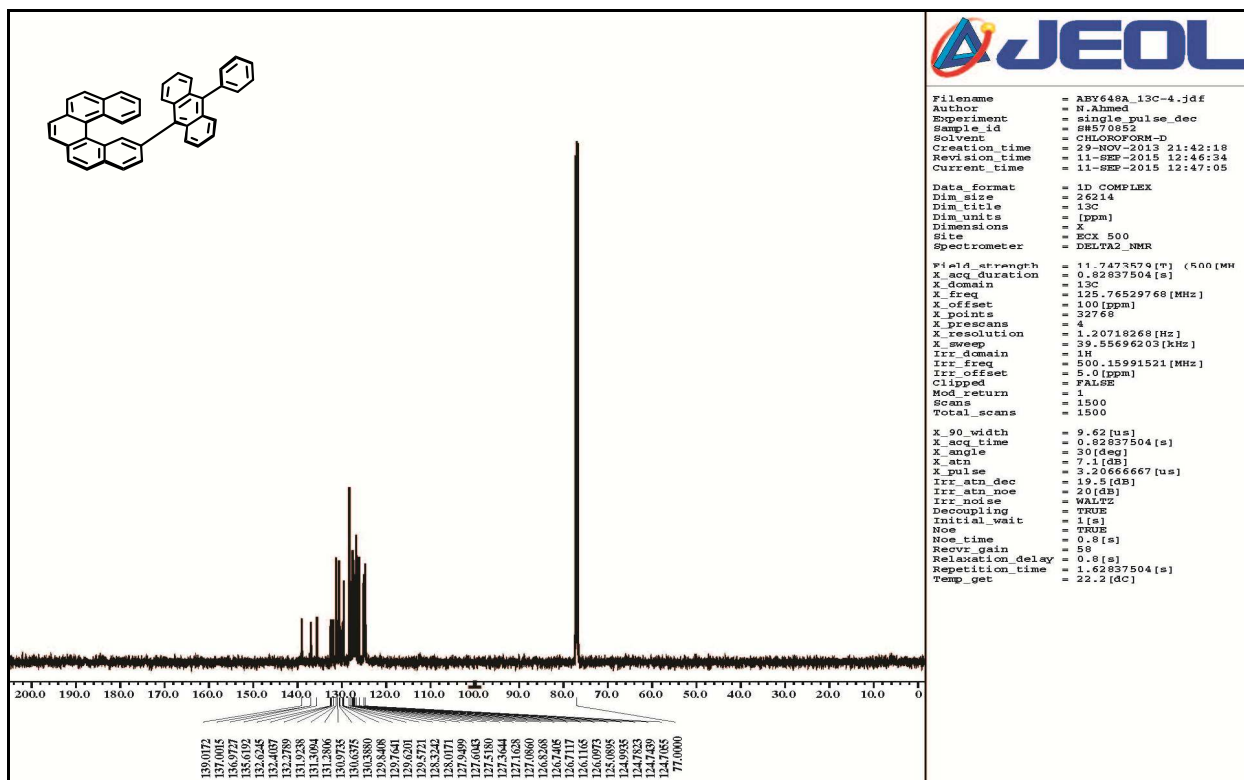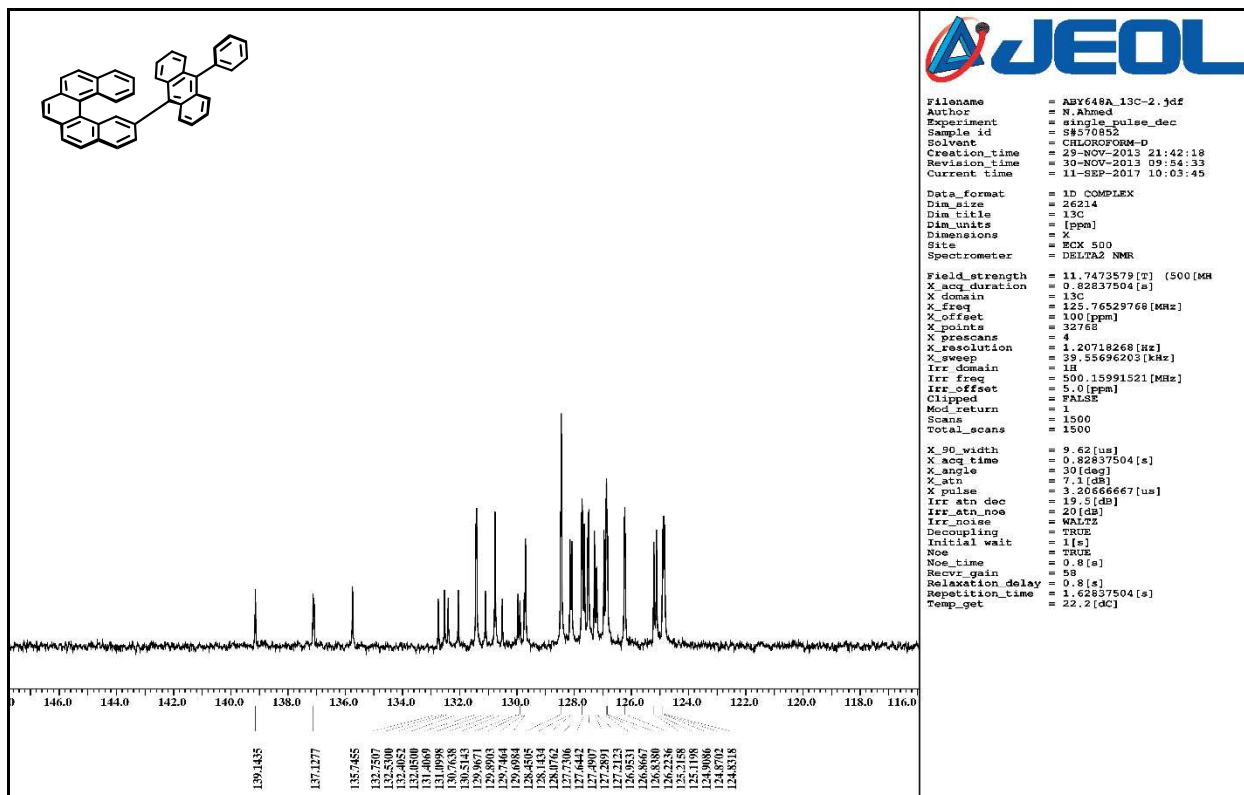

Fig. S10  $^{13}\text{C}$  (125 MHz) NMR spectra (full scale: top, expanded: below) of CHMANT in  $\text{CDCl}_3$ .

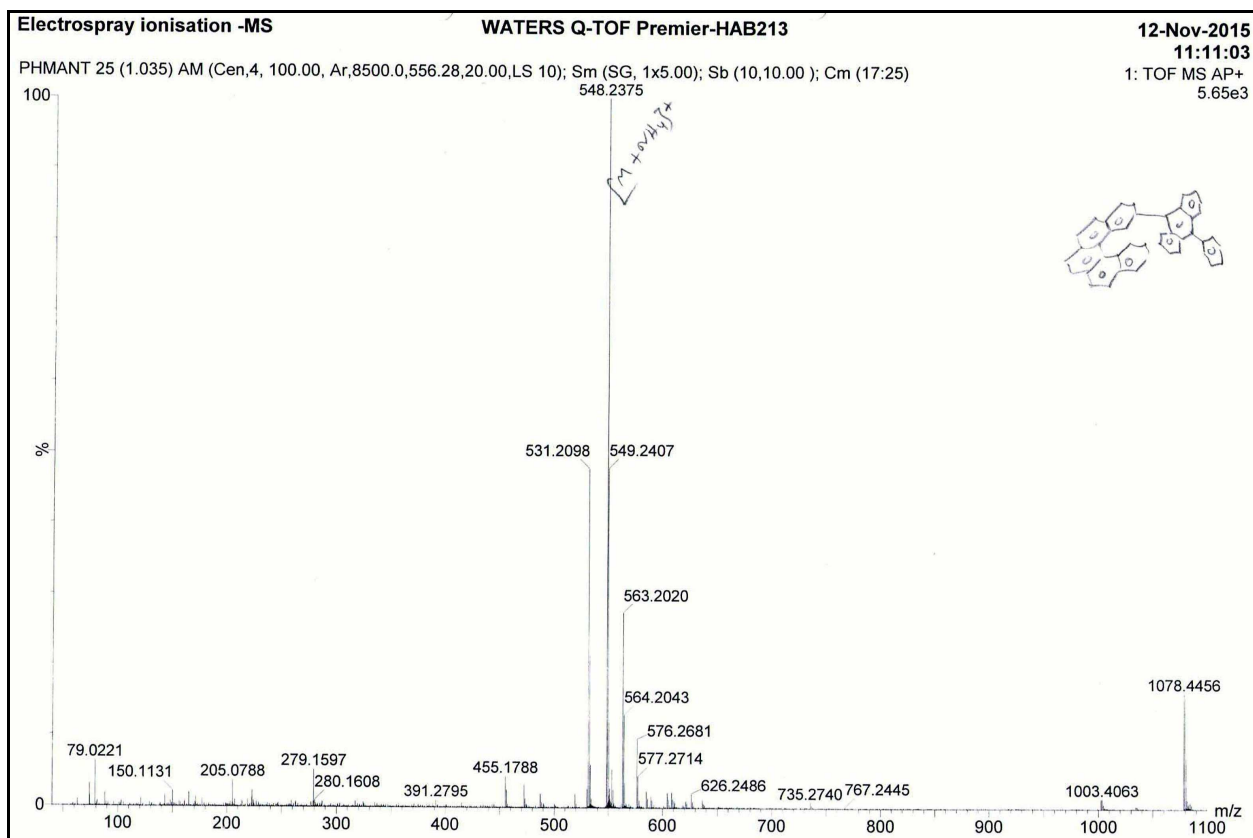

Fig. S11 ESI Mass spectrum of CHMANT.

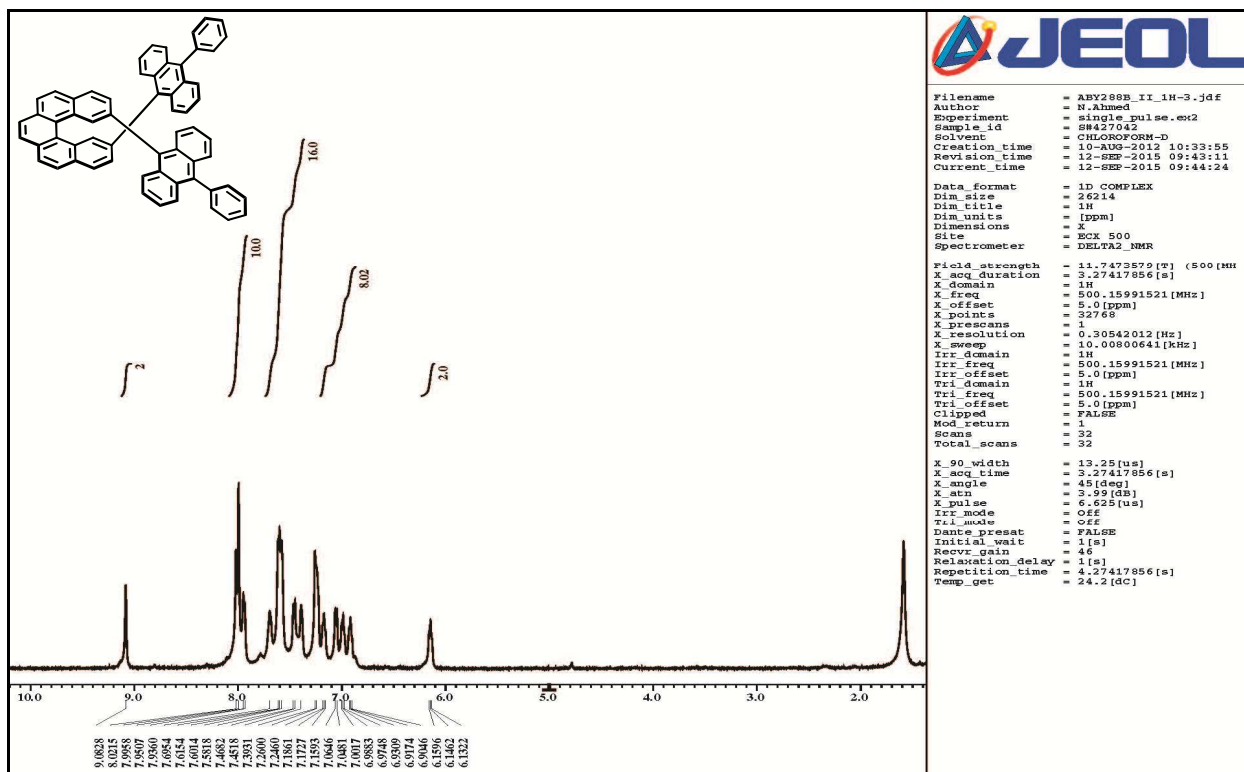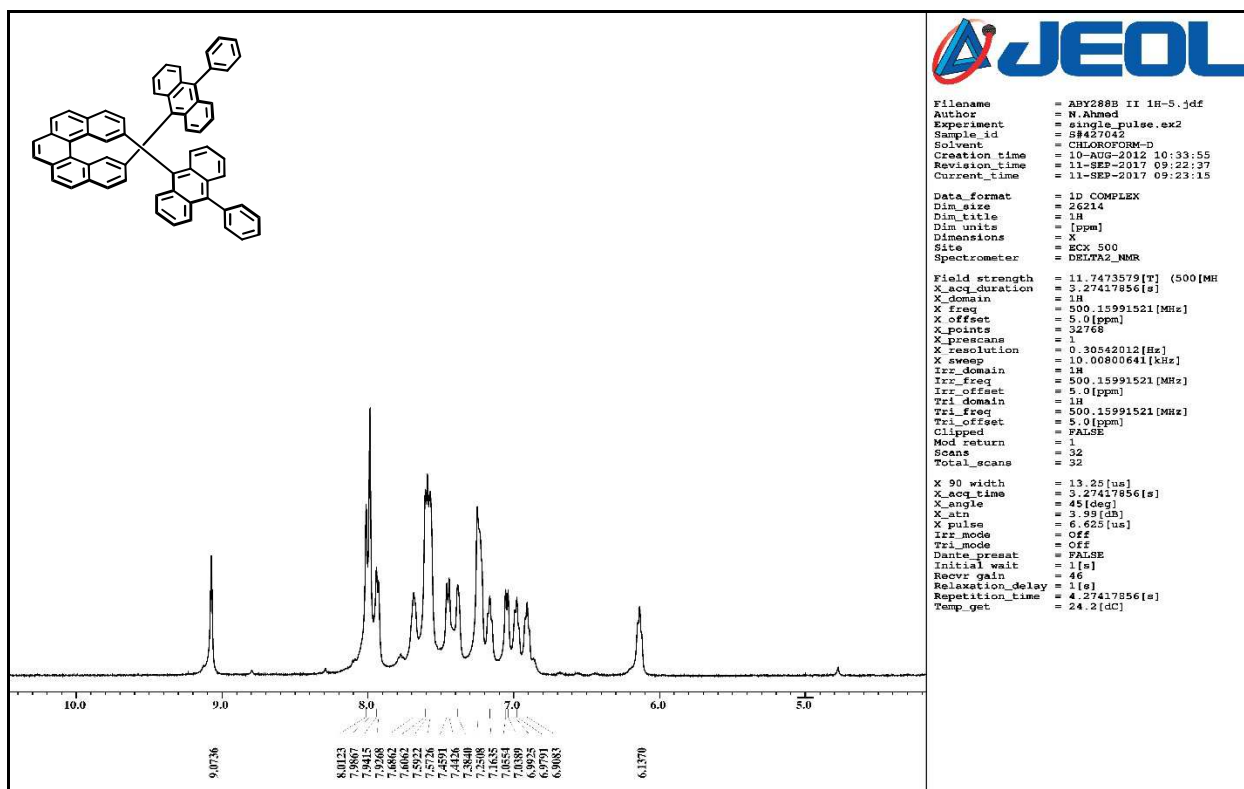

Fig. S12  $^1\text{H}$  (500 MHz) NMR spectra (full scale: top, expanded: below) of CHDANT in  $\text{CDCl}_3$ .

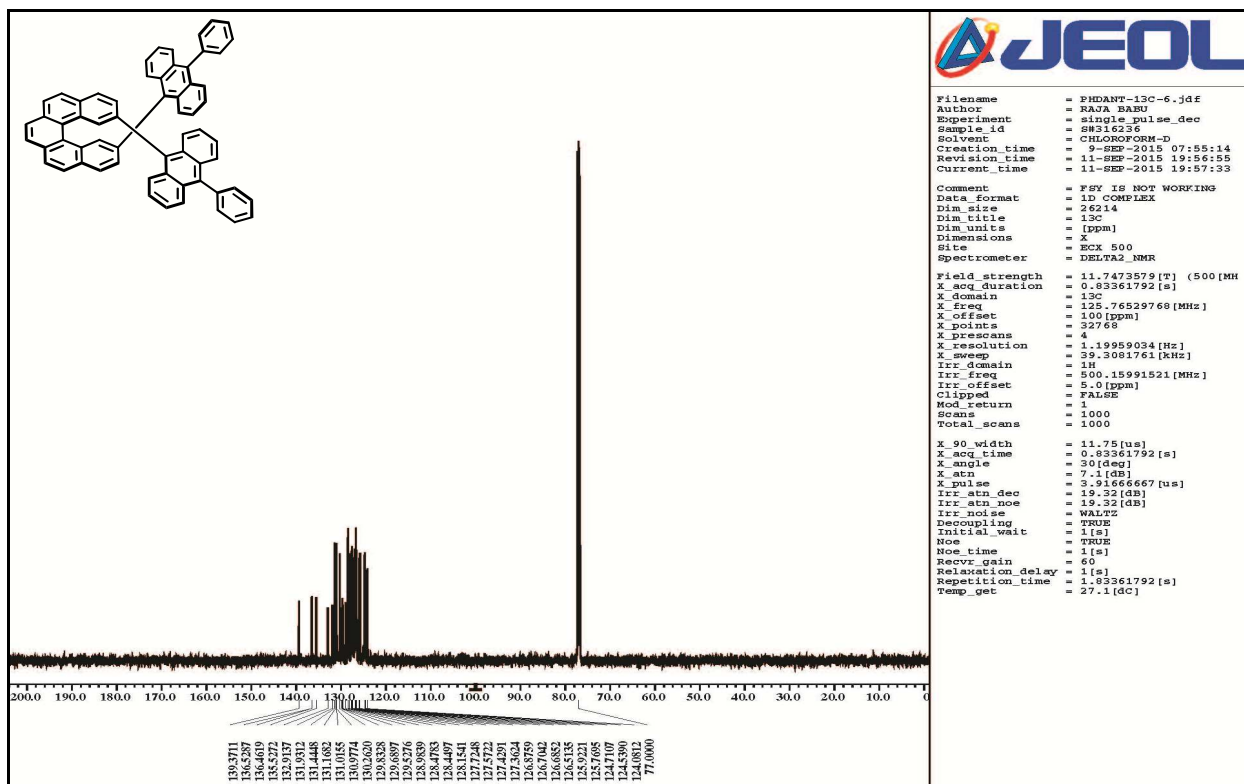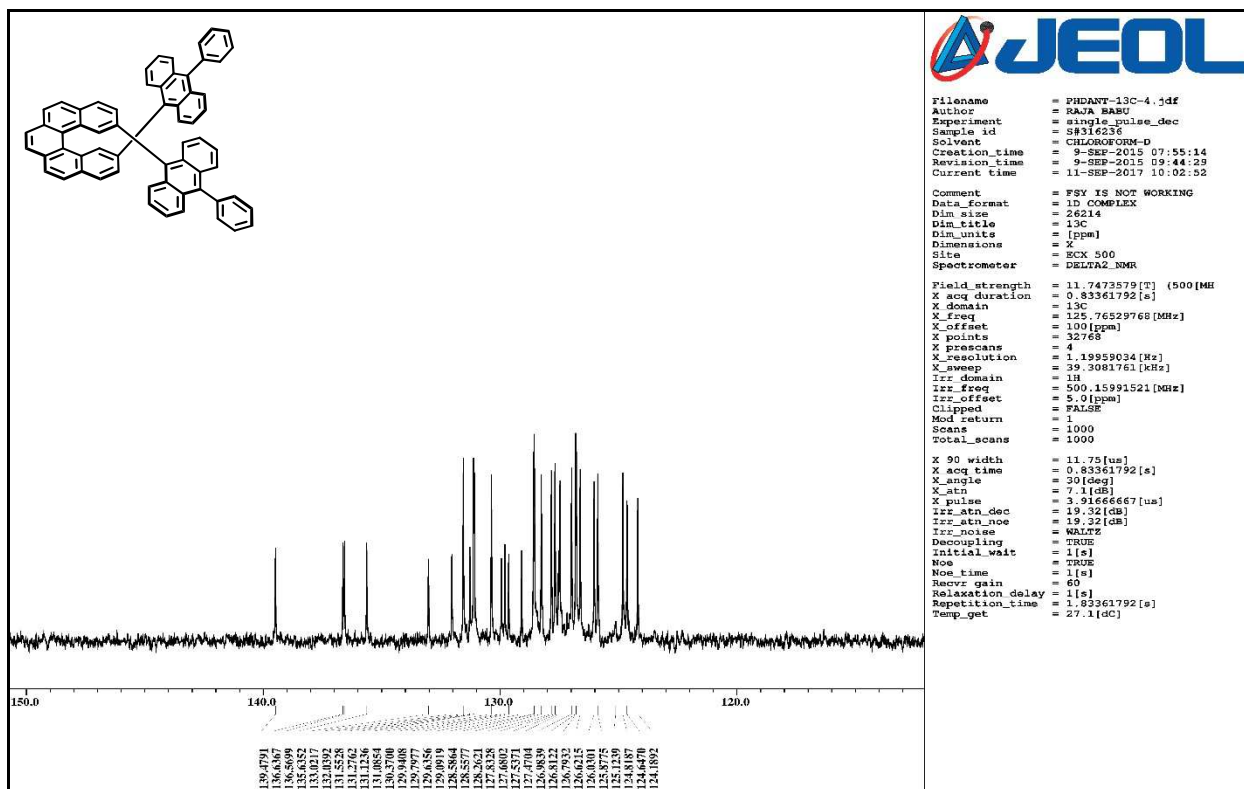

Fig. S13  $^{13}\text{C}$  (125 MHz) NMR spectra (full scale: top, expanded: below) of CHDANT in  $\text{CDCl}_3$ .

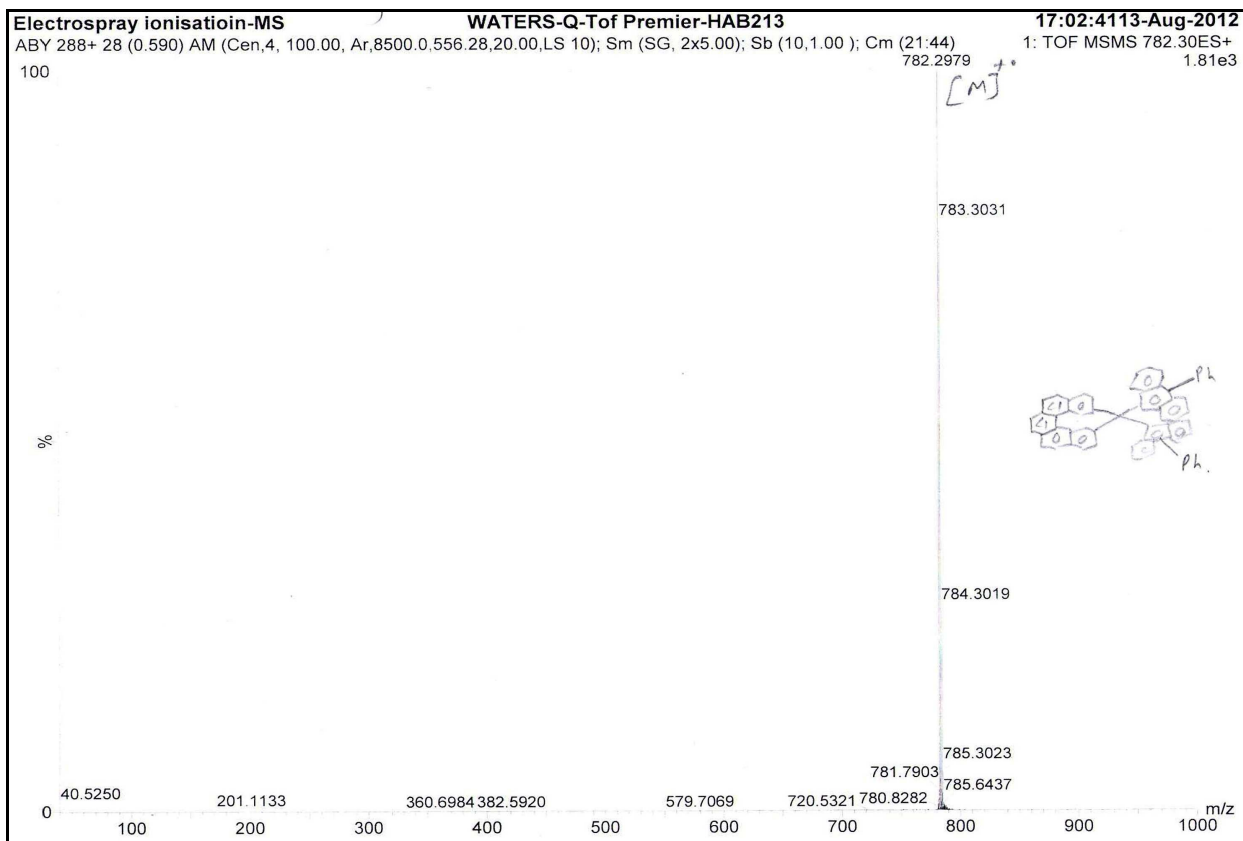

**Fig. S14** ESI Mass spectrum of **CHDANT**.



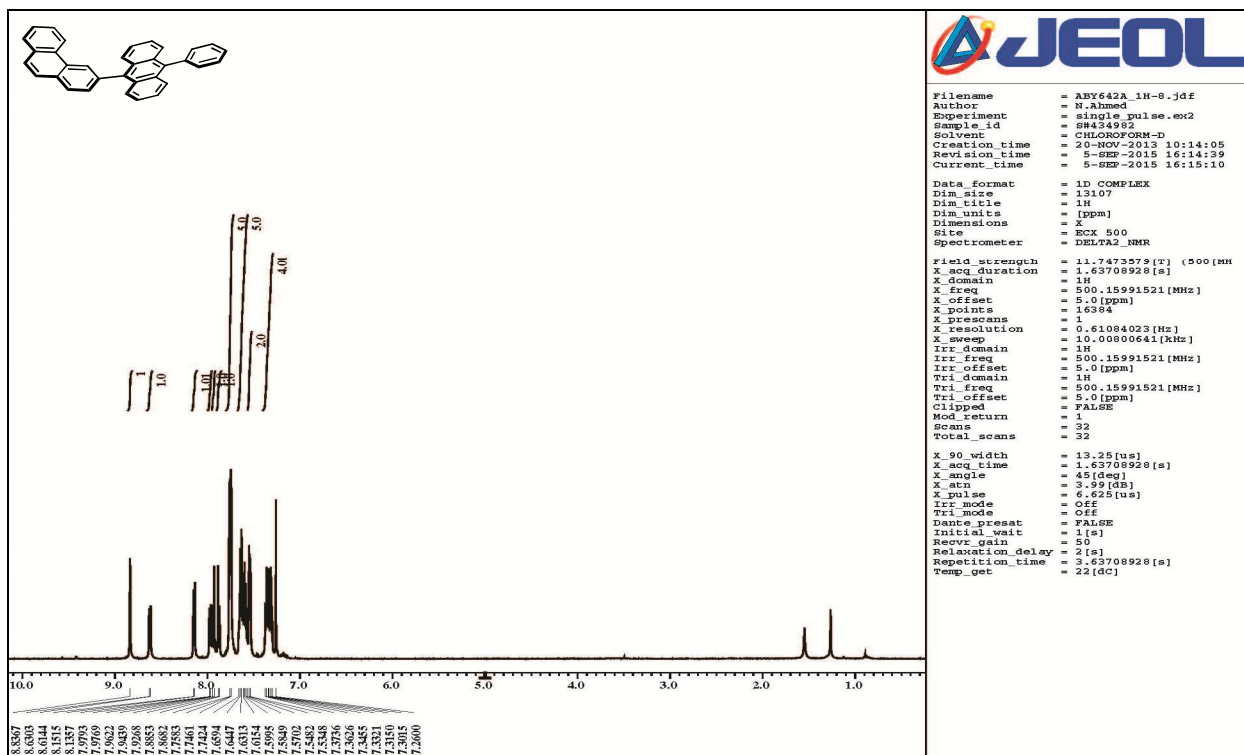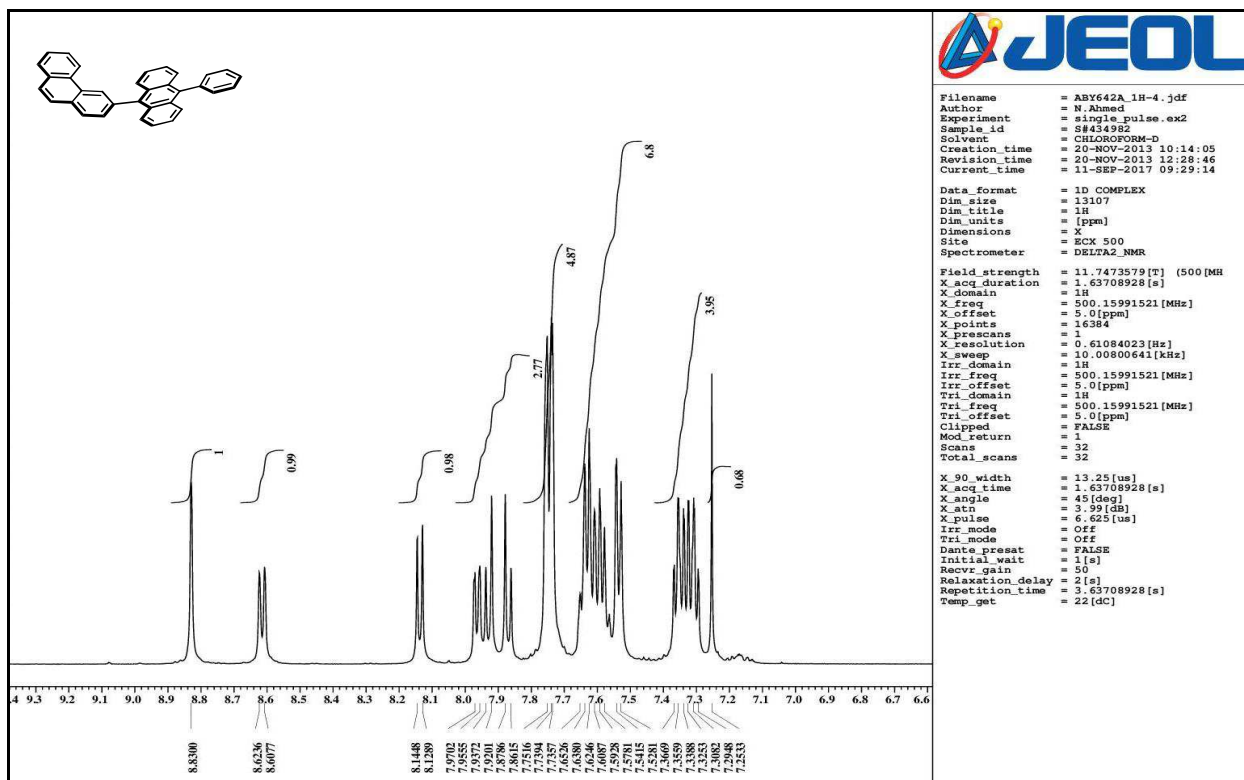

Fig. S15  $^1\text{H}$  (500 MHz) NMR spectra (full scale: top, expanded: below) of PMANT in  $\text{CDCl}_3$ .

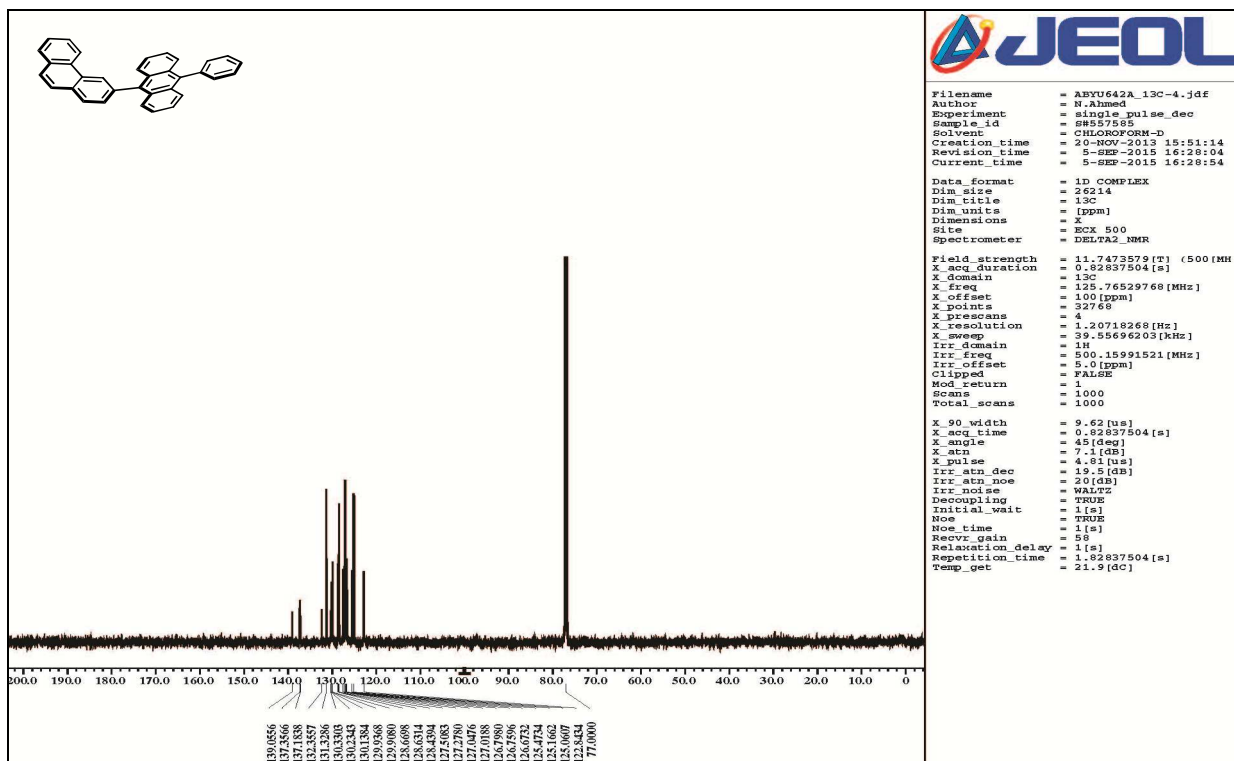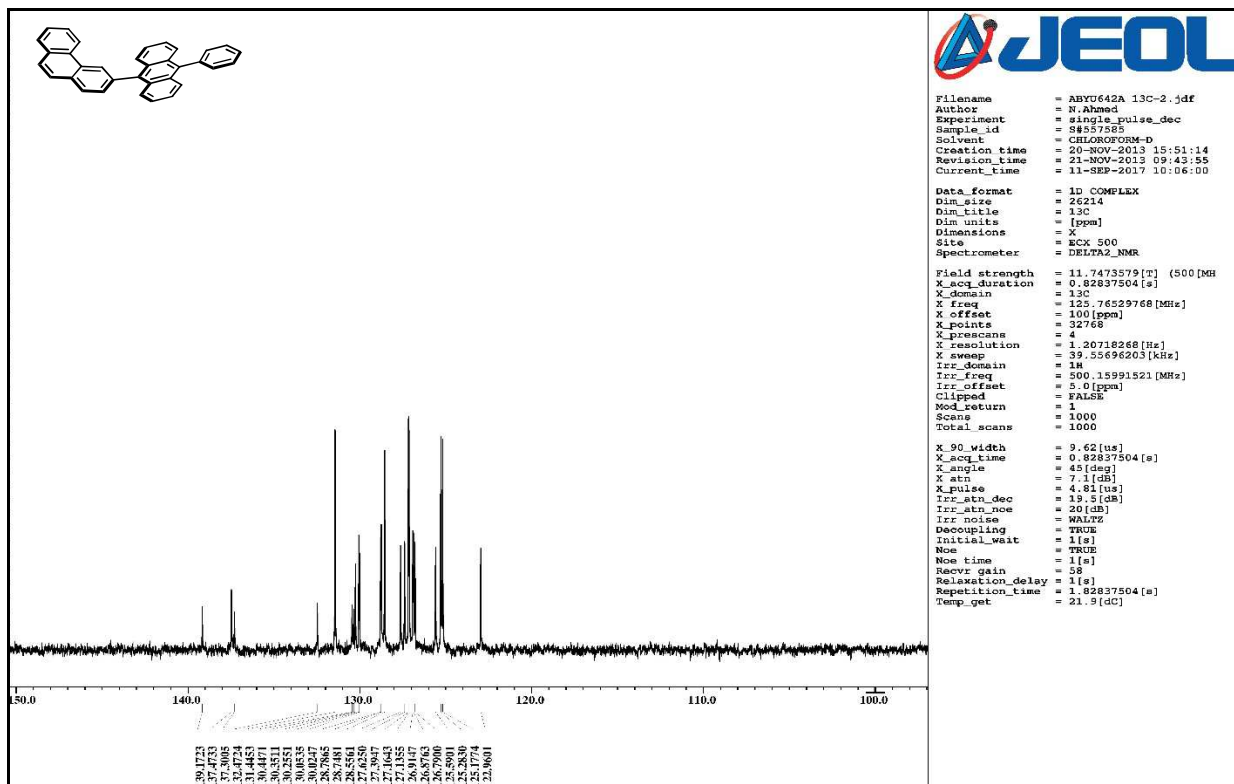

Fig. S16  $^{13}\text{C}$  (125 MHz) NMR spectra (full scale: top, expanded: below) of PMANT in  $\text{CDCl}_3$ .

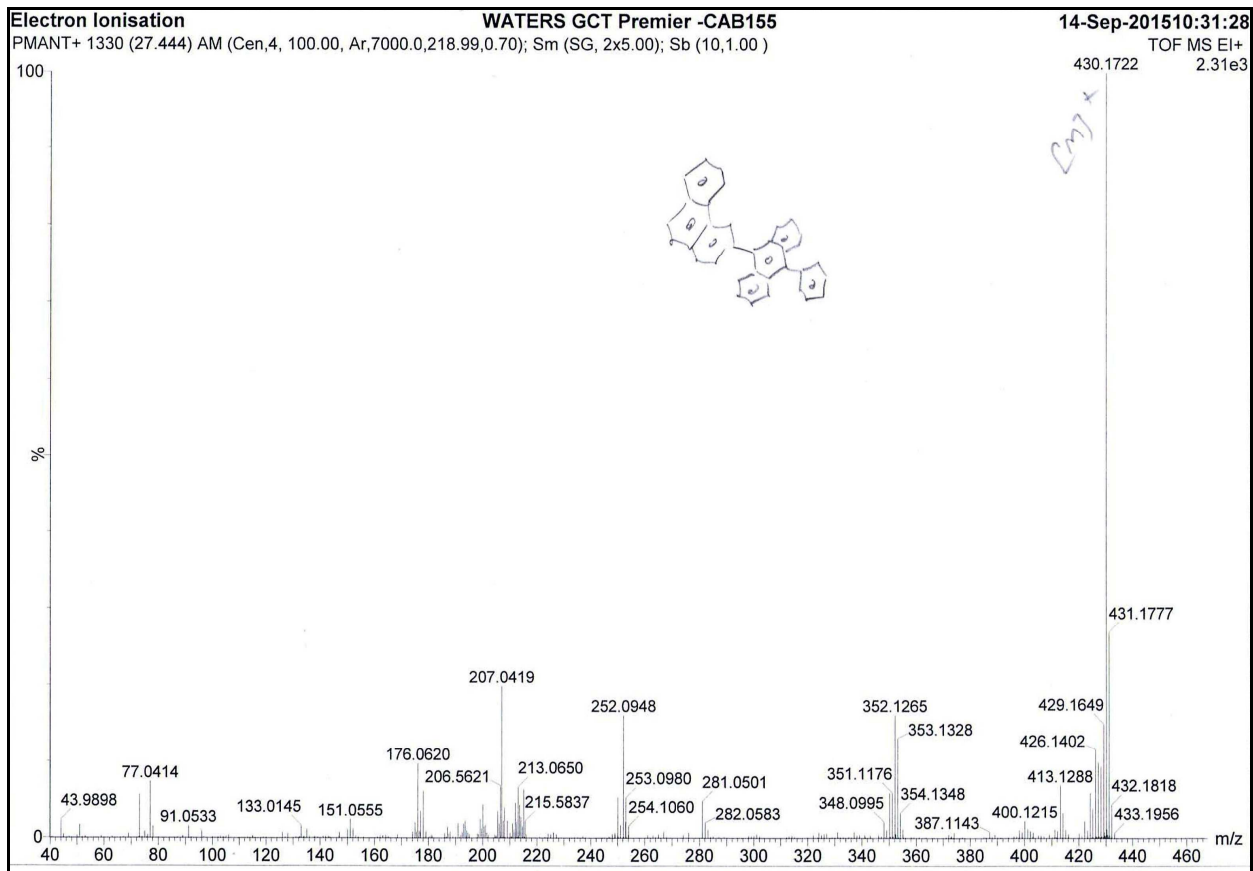

Fig. S17 EI Mass spectrum of PMANT.

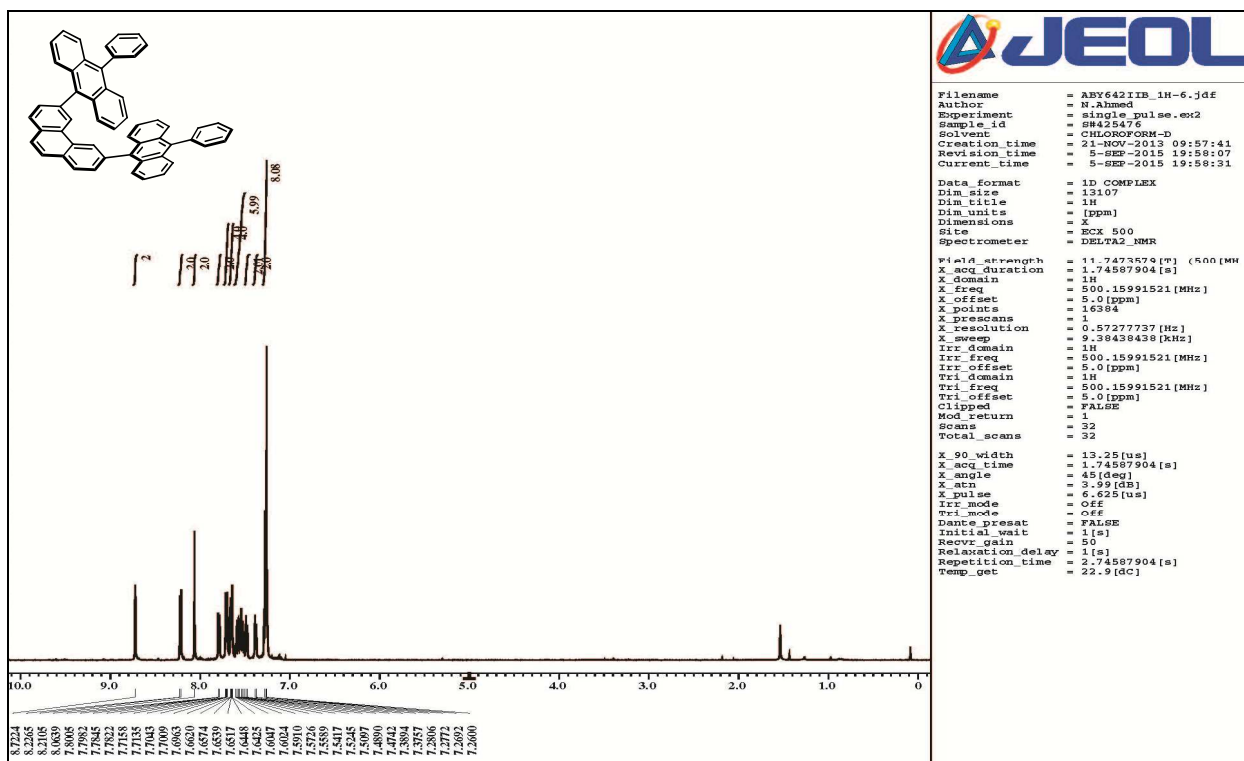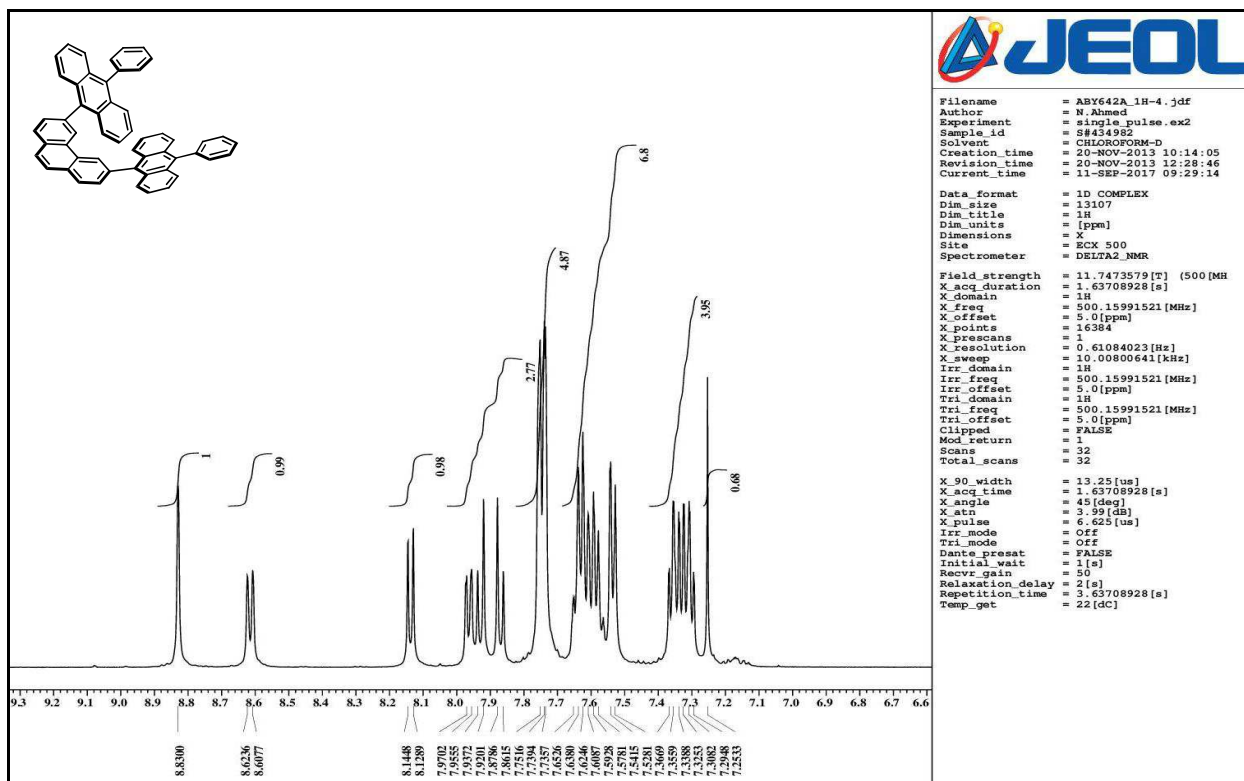

**Fig. S18**  $^1\text{H}$  (500 MHz) NMR spectra (full scale: top, expanded: below) of **PDANT** in  $\text{CDCl}_3$ .

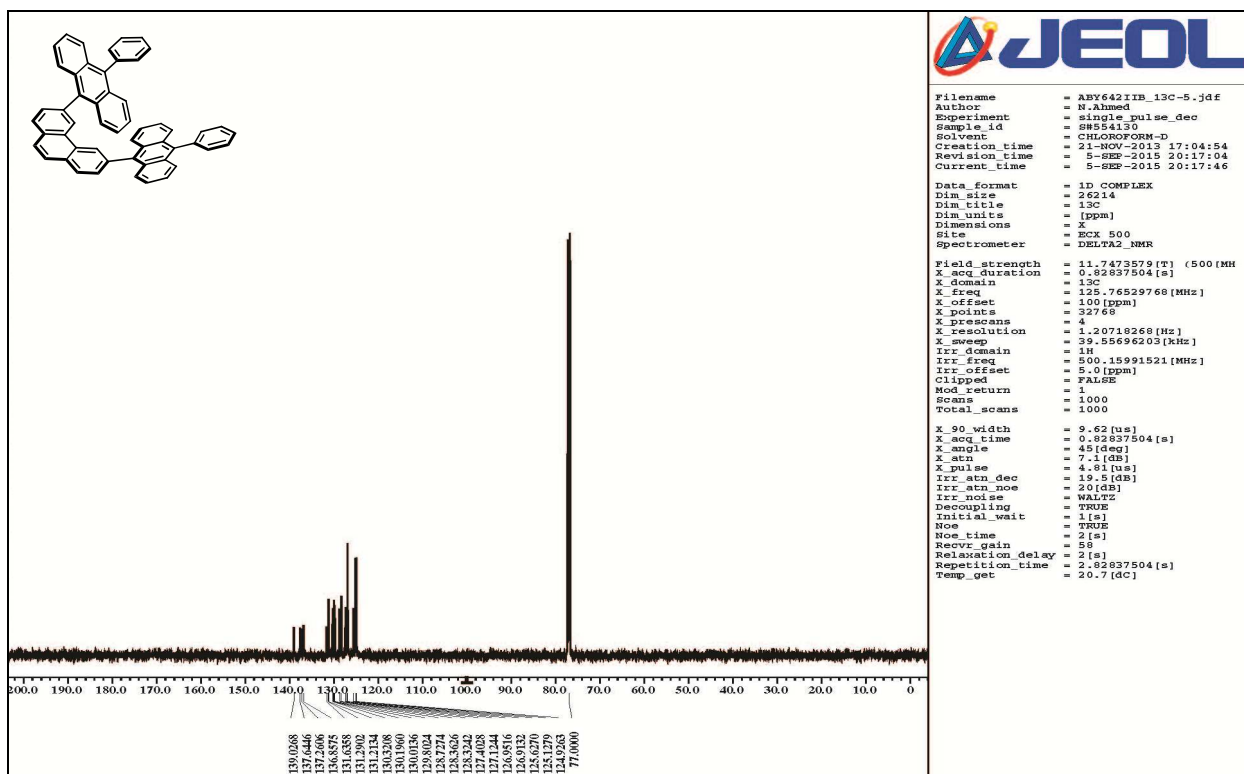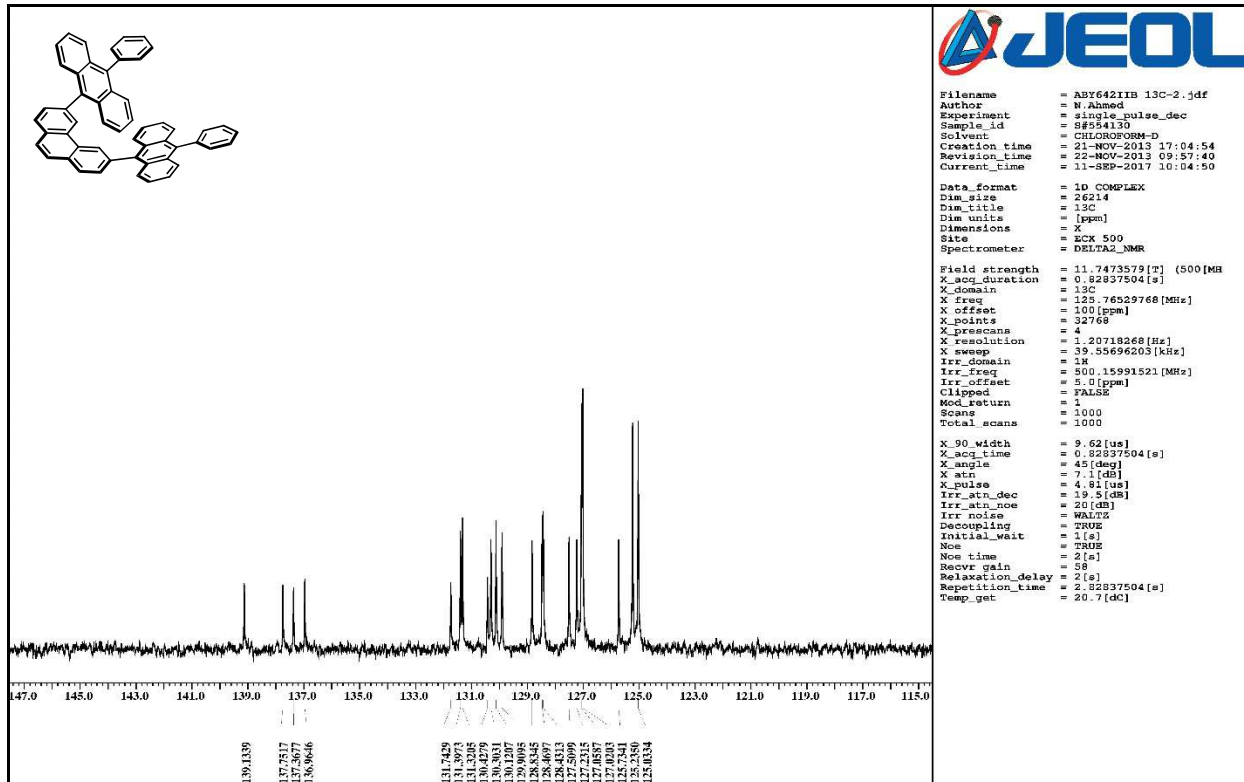

Fig. S19  $^{13}\text{C}$  (125 MHz) NMR spectra (full scale: top, expanded: below) of PDANT in  $\text{CDCl}_3$ .

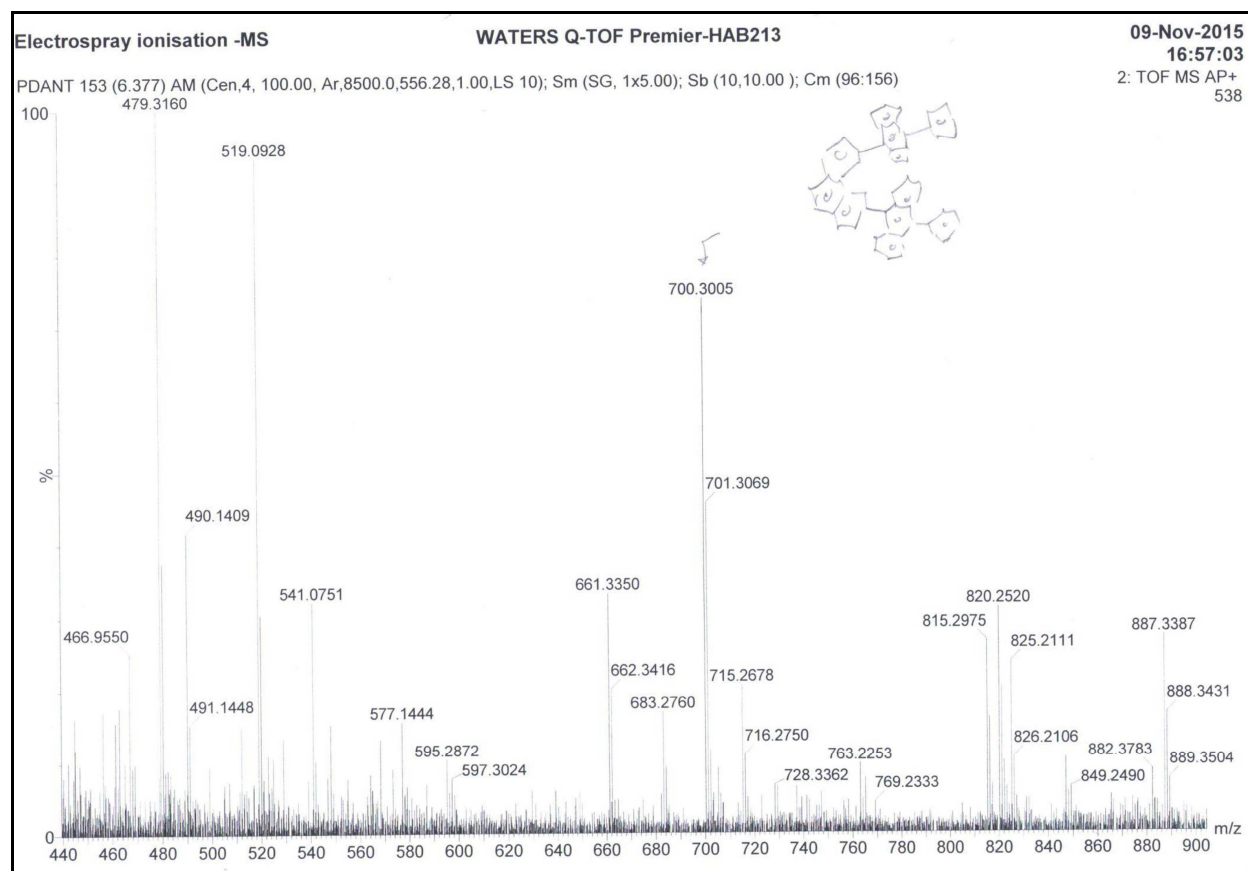

**Fig. S20** ESI Mass spectrum of **PDANT**.

## References

- S1 I. Neogi, S. Jhulki, A. Ghosh, T. J. Chow and J. N. Moorthy, *Org. Electron.*, 2014, **15**, 3766–3772.
- S2 S. Jhulki, A. K. Mishra, A. Ghosh, T. J. Chow and J. N. Moorthy, *J. Mater. Chem. C*, 2016, **4**, 9310–9315.
